# Supplementary material
Source: MDPI journal article supplement (https://www.mdpi.com/2076-3417/9/12/2530)
Supplement: s1 [file s1]

# Supplementary Materials: Plasma-derived reactive species shape a differentiation profile in human monocytes

Eric Freund, Juliane Moritz, Matthias Stope, Christian Seebauer, Anke Schmidt, Sander Bekeschus

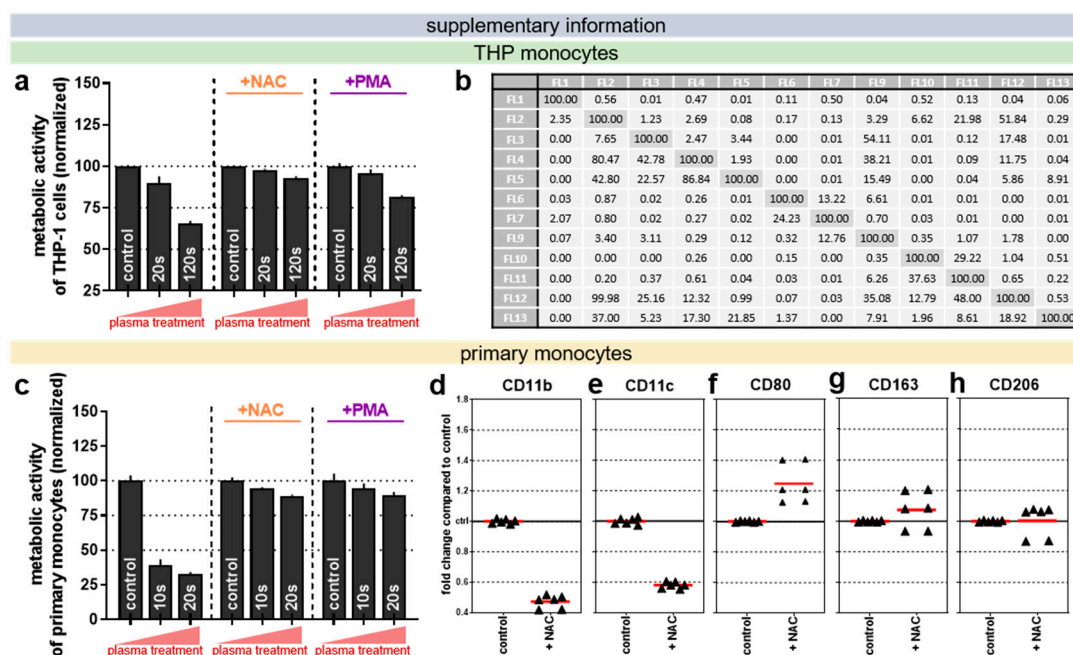

**Figure 1.** Supplementary information regarding 12-marker flow analysis and plasma effect modulation through antioxidant N-acetylcysteine (NAC). (a) Metabolic activity of untreated, or 20 s or 120 s plasma-treated THP-1 cells incubated with n-acetylcysteine (NAC) or PMA 4 h after initial treatment. (b) Compensation matrix with % subtraction of intensity values for FL1 ( $\lambda = 520/540\text{--}488$  nm; FITC), FL2 ( $\lambda = 690/650\text{--}488$  nm; PerCP-Cy5.5v), FL3 ( $\lambda = 660/620\text{--}638$  nm; APC), FL4 ( $\lambda = 712/725\text{--}638$  nm; AF700), FL5 ( $\lambda = 780/780\text{--}638$  nm; APC-Cy7), FL6 ( $\lambda = 450/445\text{--}405$  nm; Pacific Blue), FL7 ( $\lambda = 525/540\text{--}405$  nm; BV510), FL9 ( $\lambda = 660/620\text{--}405$  nm; BV650), FL10 ( $\lambda = 585/542\text{--}561$  nm; PE), FL11 ( $\lambda = 610/620\text{--}561$  nm; PE-Dazzle), FL12 ( $\lambda = 690/50\text{--}561$  nm; PE-Cy5) and FL13 ( $\lambda = 780/60\text{--}561$  nm; PE-Cy7). (c) Metabolic activity of untreated, or 10 s or 20 s plasma-treated primary monocytes incubated with NAC or PMA 4 h after treatment. (d–h) Modulation of the expression of (d) CD11b, (e) CD11c, (f) CD80, (g) CD163 and (h) CD206 in primary monocytes incubated with or without NAC. Data (a,c) are representatives out of three independent experiments and are displayed as mean + SEM, (d–h) are individual values and mean (red line) of duplicates measured in three independent experiments. Seconds (s) indicate plasma treatment time, ctrl = control.
